# Supplementary material for: Prevalence of Metabolic Syndrome according to Sasang Constitutional Medicine in Korean Subjects
Source: Hindawi journal article supplement (doi:10.1155/2012/646794), 2012-01-01
Supplement: f1 [file 646794.f1.pdf]

Supplementary Table 1. Odds ratio of MS according to SCG

| Variables | Gender | Age   | Constitution | OR           | 95% CI |                  | P-value          |
|-----------|--------|-------|--------------|--------------|--------|------------------|------------------|
|           |        |       |              |              | Lower  | Upper            |                  |
| MS        | Total  | 10-29 | SE           | 1            | -      | -                | -                |
|           |        |       | SY           | 2.21         | 0.63   | 7.76             | 0.214            |
|           |        |       | TE           | <b>4.18</b>  | 1.32   | 13.13            | <b>0.014</b>     |
|           |        | 30-49 | SE           | 1            | -      | -                | -                |
|           |        |       | SY           | <b>1.88</b>  | 1.11   | 3.18             | <b>0.02</b>      |
|           |        |       | TE           | <b>4.63</b>  | 2.81   | 7.62             | <b>1.816E-09</b> |
|           |        | 50-69 | SE           | 1            | -      | -                | -                |
|           |        |       | SY           | 1.86         | 1.15   | 3.01             | 0.12             |
|           |        |       | TE           | <b>4.21</b>  | 2.65   | 6.69             | <b>1.225E-09</b> |
|           |        | 70-89 | SE           | 1            | -      | -                | -                |
|           |        |       | SY           | 2.21         | 0.80   | 6.13             | 0.128            |
|           |        |       | TE           | <b>3.42</b>  | 1.35   | 8.68             | <b>0.01</b>      |
|           | Male   | 10-29 | SE           | 1            | -      | -                | -                |
|           |        |       | SY           | 1.93         | 0.11   | 33.13            | 0.649            |
|           |        |       | TE           | <b>11.00</b> | 1.33   | 90.81            | <b>0.026</b>     |
|           |        | 30-49 | SE           | 1            | -      | -                | -                |
|           |        |       | SY           | <b>2.85</b>  | 1.18   | 6.87             | <b>0.02</b>      |
|           |        |       | TE           | <b>6.26</b>  | 2.72   | 14.40            | <b>1.590E-05</b> |
|           |        | 50-69 | SE           | 1            | -      | -                | -                |
|           |        |       | SY           | <b>2.84</b>  | 1.11   | 7.31             | <b>0.03</b>      |
|           |        |       | TE           | <b>5.99</b>  | 2.42   | 14.82            | <b>1.055E-04</b> |
|           |        | 70-89 | SE           | 1            | -      | -                | -                |
|           |        |       | SY           | 3.00         | 0.53   | 16.90            | 0.213            |
|           |        |       | TE           | 4.00         | 0.69   | 23.09            | 0.121            |
| Female    | 10-29  | SE    | 1            | -            | -      | -                |                  |
|           |        | SY    | 1.88         | 0.45         | 7.83   | 0.387            |                  |
|           |        | TE    | 1.94         | 0.45         | 8.41   | 0.375            |                  |
|           | 30-49  | SE    | 1            | -            | -      | -                |                  |
|           |        | SY    | 1.44         | 0.74         | 2.81   | 0.284            |                  |
|           |        | TE    | <b>3.59</b>  | 1.90         | 6.76   | <b>7.800E-05</b> |                  |
|           | 50-69  | SE    | 1            | -            | -      | -                |                  |
|           |        | SY    | 1.61         | 0.91         | 2.85   | 0.103            |                  |
|           |        | TE    | <b>3.84</b>  | 2.21         | 6.69   | <b>1.899E-06</b> |                  |
|           | 70-89  | SE    | 1            | -            | -      | -                |                  |
|           |        | SY    | 1.89         | 0.52         | 6.85   | 0.332            |                  |
|           |        | TE    | <b>3.14</b>  | 1.04         | 9.50   | <b>0.042</b>     |                  |

Abbreviations: MS, metabolic syndrome; SY, So-Yang; SE, So-Eum; TE, Tae-Eum; OR, odds ratio; CI, confidence interval

P-value: multiple logistic regression analysis according to SCG

Supplementary Table 2. The distribution of MS risk factor holder according to gender and SCG

| Number of risk factor | Number (%)  |             |             |             |             |             |
|-----------------------|-------------|-------------|-------------|-------------|-------------|-------------|
|                       | Male        | Female      | Total       | SE          | SY          | TE          |
| 0                     | 96 (19.19)  | 172 (16.80) | 268 (16.57) | 124 (30.62) | 91 (16.67)  | 53 (7.96)   |
| 1                     | 132 (22.26) | 250 (24.41) | 382 (23.62) | 121 (29.88) | 150 (27.47) | 111 (16.67) |
| 2                     | 153 (25.8)  | 242 (23.63) | 395 (24.43) | 87 (21.48)  | 138 (25.27) | 170 (25.53) |
| 3                     | 118 (19.9)  | 211 (20.61) | 329 (20.35) | 55 (13.58)  | 103 (18.86) | 171 (25.68) |
| 4                     | 73 (12.31)  | 101 (9.86)  | 174 (10.76) | 16 (3.95)   | 45(8.24)    | 113 (16.97) |
| 5                     | 21 (3.54)   | 48 (4.69)   | 69 (4.27)   | 2 (0.49)    | 19 (3.48)   | 48 (7.21)   |

Values are indicated as number (%)

Abbreviations: SE, So-Eum; SY, So-Yang; TE, Tae-Eum
